# Supplementary material for: The Acute Effects of Aerobic Exercise on Nocturnal and Pre-Sleep Arousal in Patients with Unipolar Depression: Preplanned Secondary Analysis of a Randomized Controlled Trial
Source: MDPI journal article supplement (doi:10.3390/jcm10174028), 2021-09-06
Supplement: s1 [file s1]

## Supplementary

**Table S1.** Time spans for which HRV was calculated and the rationale.

| Time span                        | Operationalization                                                                                                                                                                                                                                                                                                                                                                                                                                                                                                                                                                                | Rationale                                                                                                                                                                     |
|----------------------------------|---------------------------------------------------------------------------------------------------------------------------------------------------------------------------------------------------------------------------------------------------------------------------------------------------------------------------------------------------------------------------------------------------------------------------------------------------------------------------------------------------------------------------------------------------------------------------------------------------|-------------------------------------------------------------------------------------------------------------------------------------------------------------------------------|
| Pre-sleep                        | The 5-minute segment before the first epoch of any sleep stage                                                                                                                                                                                                                                                                                                                                                                                                                                                                                                                                    | Theoretical considerations [1,2] and empirical data suggest that reducing pre-sleep arousal can ameliorate sleep [3–5].                                                       |
| Sleep period                     | The average of consecutive non-overlapping 5-min segments starting from the beginning of the first epoch of sleep to the end of the last epoch of sleep (i.e., including periods of wakefulness)                                                                                                                                                                                                                                                                                                                                                                                                  | Depression is associated with lower HRV during the night [6–10].                                                                                                              |
| Sleep stages N1, N2, N3, and REM | Only 5-min segments consisting of consecutive epochs of a particular sleep stage (N1, N2, N3, or REM) were included in the analysis. The last consecutive 5-minute segment of a particular sleep stage was excluded since changes in HRV have been shown to precede sleep stage changes [11–14]. Hence, only phases containing at least 10 minutes with consecutive epochs of a particular sleep stage were used to extract 5-min segments for the analysis. We computed the average of all 5-min segments for each sleep stage. This is analogous to the method used by Herzig et al. 2018 [15]. | We differentiate individual sleep stages as well as non-REM and REM sleep since these sleep stages also differ in terms of parasympathetic and sympathetic predominance [14]. |

## References

- Harvey, A.G. A Cognitive Model of Insomnia. *Behav Res Ther* **2002**, *40*, 869–893.
- Ong, J.C.; Ulmer, C.S.; Manber, R. Improving Sleep with Mindfulness and Acceptance: A Metacognitive Model of Insomnia. *Behav Res Ther* **2012**, *50*, 651–660, doi:10.1016/j.brat.2012.08.001.
- Sakakibara, M.; Hayano, J.; Oikawa, L.O.; Katsamanis, M.; Lehrer, P. Heart Rate Variability Biofeedback Improves Cardiorespiratory Resting Function during Sleep. *Appl Psychophysiol Biofeedback* **2013**, *38*, 265–271, doi:10.1007/s10484-013-9232-7.
- de Zambotti, M.; Sizintsev, M.; Claudatos, S.; Barresi, G.; Colrain, I.M.; Baker, F.C. Reducing Bedtime Physiological Arousal Levels Using Immersive Audio-Visual Respiratory Bio-Feedback: A Pilot Study in Women with Insomnia Symptoms. *J Behav Med* **2019**, *42*, 973–983, doi:10.1007/s10865-019-00020-9.
- Ebben, M.R.; Kurbatov, V.; Pollak, C.P. Moderating Laboratory Adaptation with the Use of a Heart-Rate Variability Biofeedback Device (StressEraser). *Appl Psychophysiol Biofeedback* **2009**, *34*, 245–249, doi:10.1007/s10484-009-9086-1.
- Yang, A.C.; Tsai, S.-J.; Yang, C.-H.; Kuo, C.-H.; Chen, T.-J.; Hong, C.-J. Reduced Physiologic Complexity Is Associated with Poor Sleep in Patients with Major Depression and Primary Insomnia. *Journal of Affective Disorders* **2011**, *131*, 179–185, doi:10.1016/j.jad.2010.11.030.
- Leistedt, S.J.-J.; Linkowski, P.; Lanquart, J.-P.; Mietus, J.E.; Davis, R.B.; Goldberger, A.L.; Costa, M.D. Decreased Neuroautonomic Complexity in Men during an Acute Major Depressive Episode: Analysis of Heart Rate Dynamics. *Translational Psychiatry* **2011**, *1*, e27–e27, doi:10.1038/tp.2011.23.
- Saad, M.; Ray, L.B.; Bujaki, B.; Parvaresh, A.; Palamarchuk, I.; De Koninck, J.; Douglass, A.; Lee, E.K.; Soucy, L.J.; Fogel, S.; et al. Using Heart Rate Profiles during Sleep as a Biomarker of Depression. *BMC Psychiatry* **2019**, *19*, 168, doi:10.1186/s12888-019-2152-1.
- Pawlowski, M.A.; Gazea, M.; Wollweber, B.; Dresler, M.; Holsboer, F.; Keck, M.E.; Steiger, A.; Adamczyk, M.; Mikoteit, T. Heart Rate Variability and Cognition in Rapid Eye Movement Sleep as Biomarkers of Depression and Treatment Response. *J Psychiatr Res* **2017**, *92*, 64–73, doi:10.1016/j.jpsychires.2017.03.026.
- Kwon, H.B.; Yoon, H.; Choi, S.H.; Choi, J.-W.; Lee, Y.J.; Park, K.S. Heart Rate Variability Changes in Major Depressive Disorder during Sleep: Fractal Index Correlates with BDI Score during REM Sleep. *Psychiatry Research* **2019**, *271*, 291–298, doi:10.1016/j.psychres.2018.11.021.
- Jurysta, F.; van de Borne, P.; Migeotte, P.-F.; Dumont, M.; Lanquart, J.-P.; Degaute, J.-P.; Linkowski, P. A Study of the Dynamic Interactions between Sleep EEG and Heart Rate Variability in Healthy Young Men. *Clin Neurophysiol* **2003**, *114*, 2146–2155, doi:10.1016/s1388-2457(03)00215-3.
- Long, X.; Arends, J.B.; Aarts, R.M.; Haakma, R.; Fonseca, P.; Rolink, J. Time Delay between Cardiac and Brain Activity during Sleep Transitions. *Appl. Phys. Lett.* **2015**, *106*, 143702, doi:10.1063/1.4917221.
- Jurysta, F.; Kempnaers, C.; Lancini, J.; Lanquart, J.-P.; van de Borne, P.; Linkowski, P. Altered Interaction between Cardiac Vagal Influence and Delta Sleep EEG Suggests an Altered Neuroplasticity in Patients Suffering from Major Depressive Disorder. *Acta Psychiatr Scand* **2010**, *121*, 236–239, doi:10.1111/j.1600-0447.2009.01475.x.

14. de Zambotti, M.; Trinder, J.; Silvani, A.; Colrain, I.M.; Baker, F.C. Dynamic Coupling between the Central and Autonomic Nervous Systems during Sleep: A Review. *Neuroscience & Biobehavioral Reviews* **2018**, *90*, 84–103, doi:10.1016/j.neubiorev.2018.03.027.
15. Herzig, D.; Eser, P.; Omlin, X.; Riener, R.; Wilhelm, M.; Achermann, P. Reproducibility of Heart Rate Variability Is Parameter and Sleep Stage Dependent. *Front Physiol* **2018**, *8*, doi:10.3389/fphys.2017.01100.
